# Supplementary material
Source: Springer Nature journal article supplement (https://www.springermedizin.de/resource/supplementary/12911_2007_185_MOESM4_ESM.pdf/9527330)

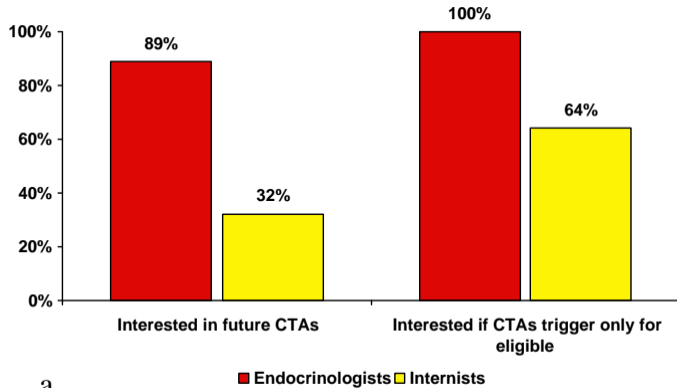

a.

■ Endocrinologists ■ Internists

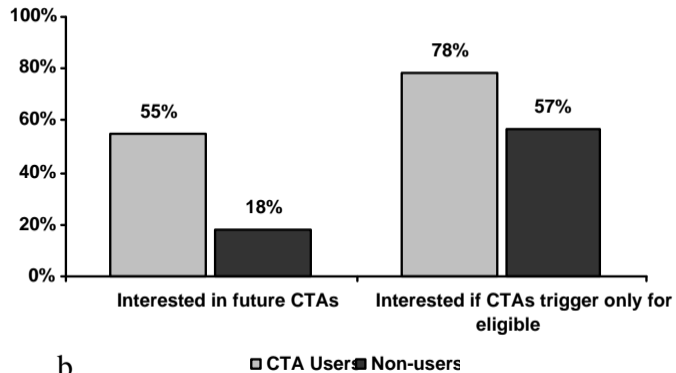

b.

■ CTA Users ■ Non-users

Supplement: MOESM4 [file 9527330]
